# Supplementary material for: Profile of Small RNAs, vDNA Forms and Viral Integrations in Late Chikungunya Virus Infection of Aedes albopictus Mosquitoes
Source: MDPI journal article supplement (doi:10.3390/v13040553), 2021-03-25

**Supplemental figure 5.** Bar plot of significantly enriched pathways based on differential sRNA abundance in CHIKV -infected ovaries and carcasses. Results refer to the *Aedes aegypti* KEGG pathway annotation.

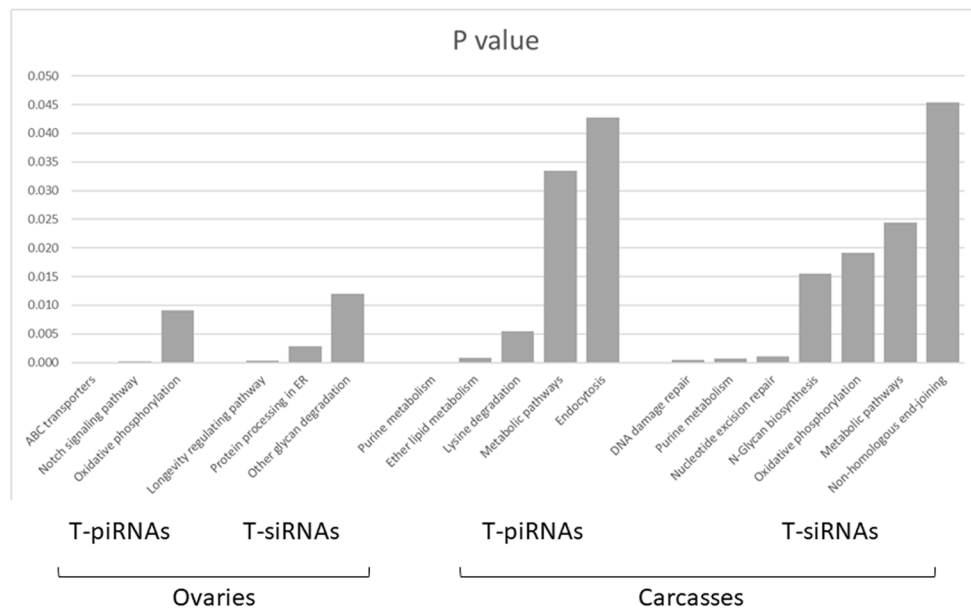

Supplement: s1 [file s1]
