# Supplementary material for: Profile of Small RNAs, vDNA Forms and Viral Integrations in Late Chikungunya Virus Infection of Aedes albopictus Mosquitoes
Source: MDPI journal article supplement (doi:10.3390/v13040553), 2021-03-25

**Supplemental figure 2** . Length distribution of the full collection of *Aedes aegypti* miRNAs downloaded from miRBase.

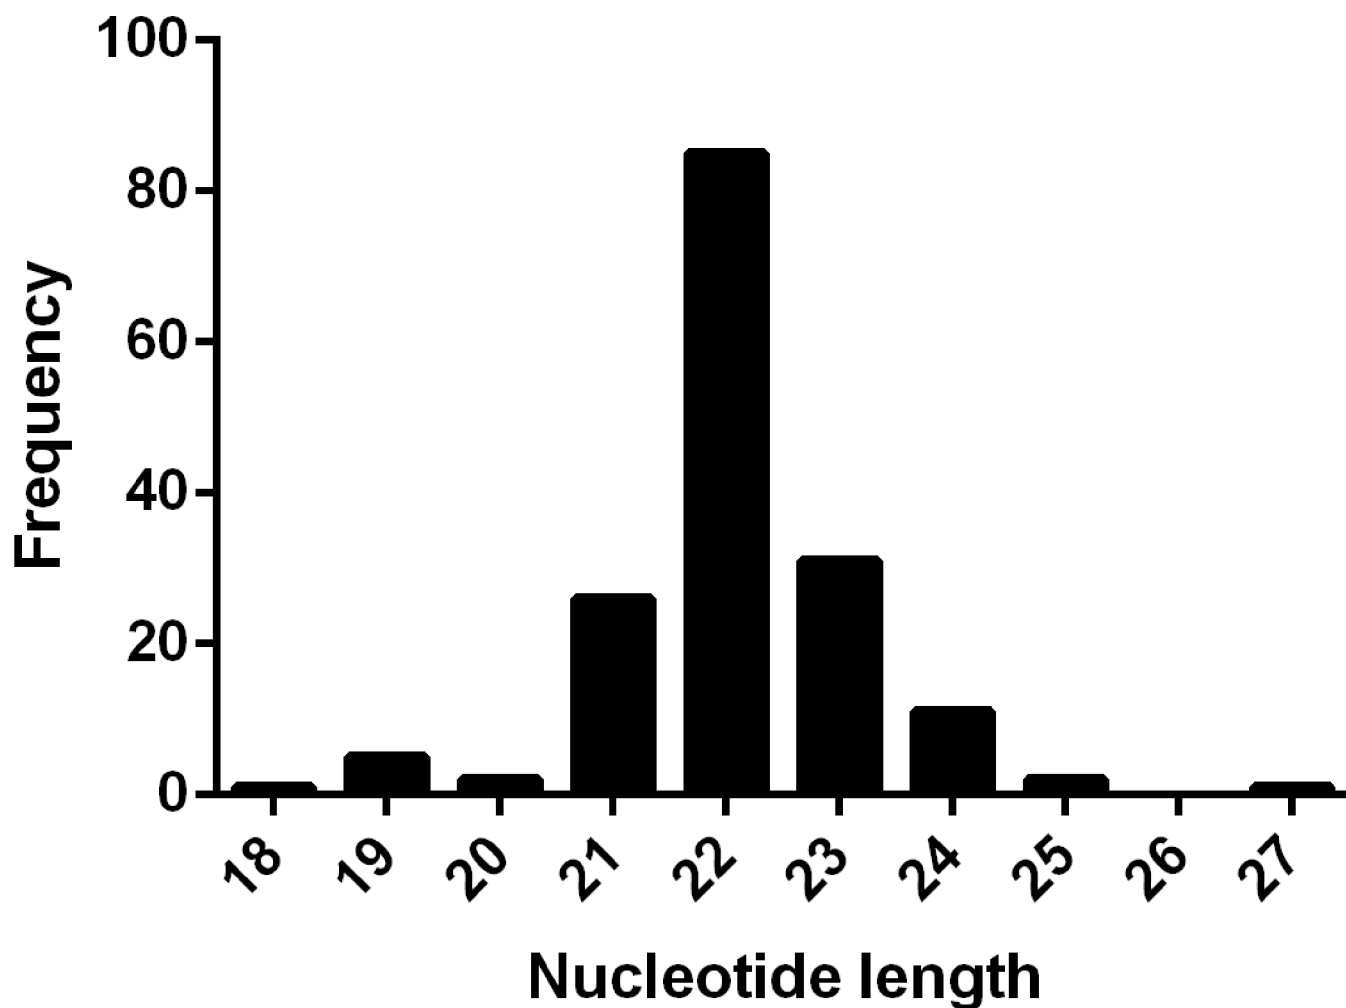

Supplement: s1 [file s1]
