# Supplementary material for: Profile of Small RNAs, vDNA Forms and Viral Integrations in Late Chikungunya Virus Infection of Aedes albopictus Mosquitoes
Source: MDPI journal article supplement (doi:10.3390/v13040553), 2021-03-25

**Supplemental figure 7.** Venn diagram representing the intersection of the sRNA differential abundance across each nrEVE based on the three different library sizes for normalization. A) piRNA abundance across in infected vs blood-fed ovaries; B) siRNA abundance across in infected vs blood-fed ovaries; C) siRNA abundance across in infected vs blood -fed carcasses. No significant differential abundance was found for piRNAs in carcasses.

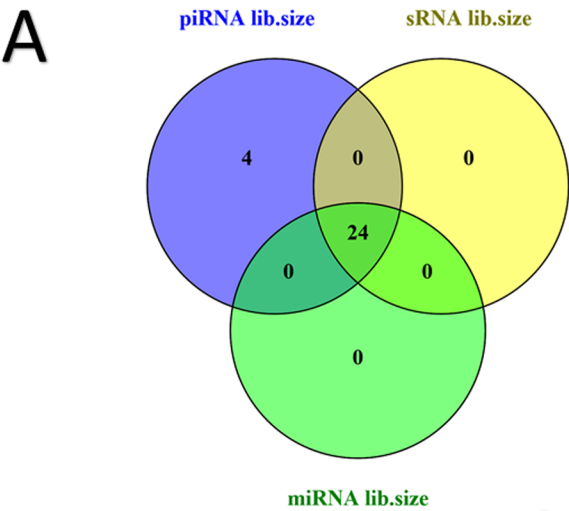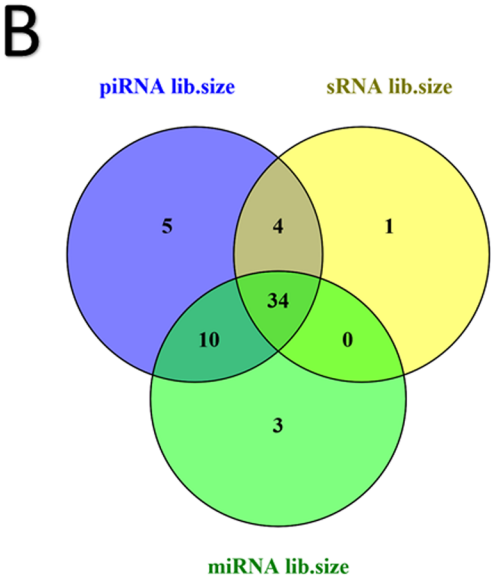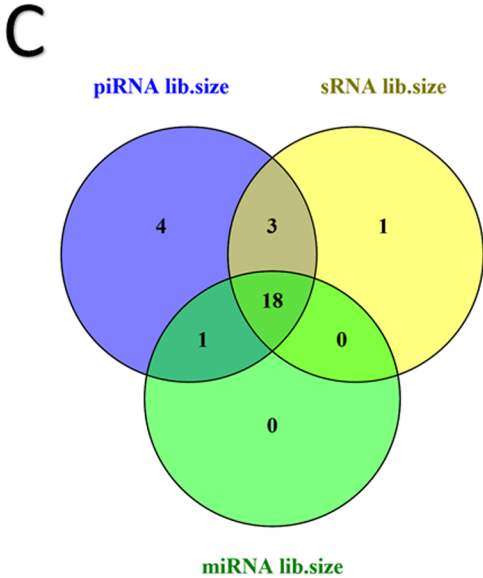

Supplement: s1 [file s1]
